# Supplementary material for: Genomics-inspired discovery of massiliachelin, an agrochelin epimer from Massilia sp. NR 4-1
Source: PubMed Central journal article supplement (PMC6604713; doi:10.3762/bjoc.15.128), 2019-06-13
Supplement: Beilstein_J_Org_Chem-15-1298-s001.pdf [file Beilstein_J_Org_Chem-15-1298-s001.pdf]

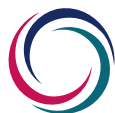

## Supporting Information

for

### **Genomics-inspired discovery of massiliachelin, an agrochelin epimer from *Massilia* sp. NR 4-1**

Jan Diettrich, Hirokazu Kage and Markus Nett

*Beilstein J. Org. Chem.* **2019**, *15*, 1298–1303. [doi:10.3762/bjoc.15.128](https://doi.org/10.3762/bjoc.15.128)

### **Additional tables and copies of NMR spectra**

## Table of contents

|                                                                                                                              |    |
|------------------------------------------------------------------------------------------------------------------------------|----|
| Table S1: Epimerization domains in pyochelin-type synthetases and configuration of the generated thiazoline ring. ....       | S2 |
| Table S2: Alignment of the residue 88–103 and 134–148 regions of the ketoreductase (KR) domains in MicG-like proteins.....   | S2 |
| Table S3: Stereochemistry of siderophores with a thiazoline-thiazolidine motif .....                                         | S2 |
| Figure S1: $^1\text{H}$ NMR spectrum of massiliachelin ( <b>1</b> ) in chloroform- <i>d</i> .....                            | S3 |
| Figure S2: $^1\text{H}$ -decoupled $^{13}\text{C}$ NMR spectrum of massiliachelin ( <b>1</b> ) in chloroform- <i>d</i> ..... | S4 |
| Figure S3: $^1\text{H}$ , $^1\text{H}$ COSY spectrum of massiliachelin ( <b>1</b> ) in chloroform- <i>d</i> .....            | S5 |
| Figure S4: $^1\text{H}$ , $^{13}\text{C}$ HSQC spectrum of massiliachelin ( <b>1</b> ) in chloroform- <i>d</i> .....         | S6 |
| Figure S5: $^1\text{H}$ , $^{13}\text{C}$ HMBC spectrum of massiliachelin ( <b>1</b> ) in chloroform- <i>d</i> .....         | S7 |
| Figure S6: $^1\text{H}$ , $^1\text{H}$ NOESY spectrum of massiliachelin ( <b>1</b> ) in chloroform- <i>d</i> .....           | S8 |
| Figure S7: HRESIMS spectrum of massiliachelin ( <b>1</b> ).....                                                              | S9 |

**Table S1:** Epimerization domains in pyochelin-type synthetases and configuration of the generated thiazoline ring.

|                             | Protein accession # of PchE homolog | Methyltransferase-like epimerization domain in PchE homolog | Configuration of thiazoline ring (proposed) |
|-----------------------------|-------------------------------------|-------------------------------------------------------------|---------------------------------------------|
| Pyochelin                   | AAD55800                            | Yes                                                         | D                                           |
| Enantio-pyochelin           | ABW70809                            | No                                                          | L                                           |
| Yersiniabactin              | P48633                              | Yes                                                         | D                                           |
| Micacocidin                 | CAD15508                            | Yes                                                         | D                                           |
| Massiliachelin ( <b>1</b> ) | AKU20507                            | Yes                                                         | (D)                                         |

**Table S2:** Alignment of the residue 88–103 and 134–148 regions of the ketoreductase (KR) domains in MicG from *Ralstonia solanacearum* GMI1000, HMWP1 from *Yersinia pestis* KIM6+, and ACZ\_RS02195 from *Massilia* sp. NR 4-1.

|         | Protein accession # | 88–103 region              | 134–149 region            | KR-type | Configuration (proposed) |
|---------|---------------------|----------------------------|---------------------------|---------|--------------------------|
| MicG    | CAD15512            | HLAGIVR <b>D</b> APLAAADWR | FSSAASACG <b>A</b> PGQGAH | B       | <i>S</i>                 |
| HMWP1   | AAC69588            | HAAGVL <b>A</b> DAPLQELDDH | YSSAAATLG <b>A</b> PGQSAH | B       | <i>S</i>                 |
| RS02195 | WP_050407226        | HLAAVV <b>R</b> DATLAAINTE | FSSAATAFG <b>A</b> PGQGAY | B       | ( <i>S</i> )             |

**Table S3:** Stereochemistry of siderophores with a thiazoline-thiazolidine motif.

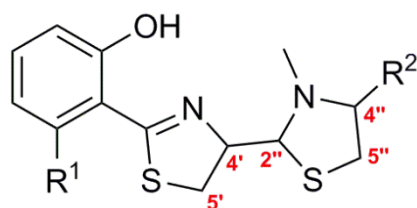

| Natural product             | Configuration                             | $\delta(\text{H-4}')$ , m ( <i>J</i> in Hz) measured in CDCl <sub>3</sub> | Reference in main manuscript |
|-----------------------------|-------------------------------------------|---------------------------------------------------------------------------|------------------------------|
| Pyochelin I                 | 4' <i>R</i> , 2'' <i>R</i> , 4'' <i>R</i> | 5.08, td (8.8, 5.0)                                                       | [19]                         |
| Yersiniabactin I            | 4' <i>R</i> , 2'' <i>R</i> , 4'' <i>R</i> | 5.15, td (9.2, 4.8)                                                       | [26]                         |
| Massiliachelin ( <b>1</b> ) | 4' <i>R</i> , 2'' <i>R</i> , 4'' <i>R</i> | 5.09, td (9.9, 6.4)                                                       | This study                   |
| Neopyochelin I              | 4' <i>S</i> , 2'' <i>S</i> , 4'' <i>R</i> | 5.12, td (9.1, 4.6)                                                       | [19]                         |
| Pyochelin II                | 4' <i>R</i> , 2'' <i>S</i> , 4'' <i>R</i> | 4.92, q (8.2)                                                             | [19]                         |
| Yersiniabactin II           | 4' <i>R</i> , 2'' <i>S</i> , 4'' <i>R</i> | 4.78, q (n.d.)                                                            | [21]                         |
| Agrochelin ( <b>2</b> )     | 4' <i>R</i> , 2'' <i>S</i> , 4'' <i>R</i> | 4.72, q (8.7)                                                             | [17]                         |
| Neopyochelin II             | 4' <i>S</i> , 2'' <i>R</i> , 4'' <i>R</i> | 4.79, q (8.0)                                                             | [19]                         |

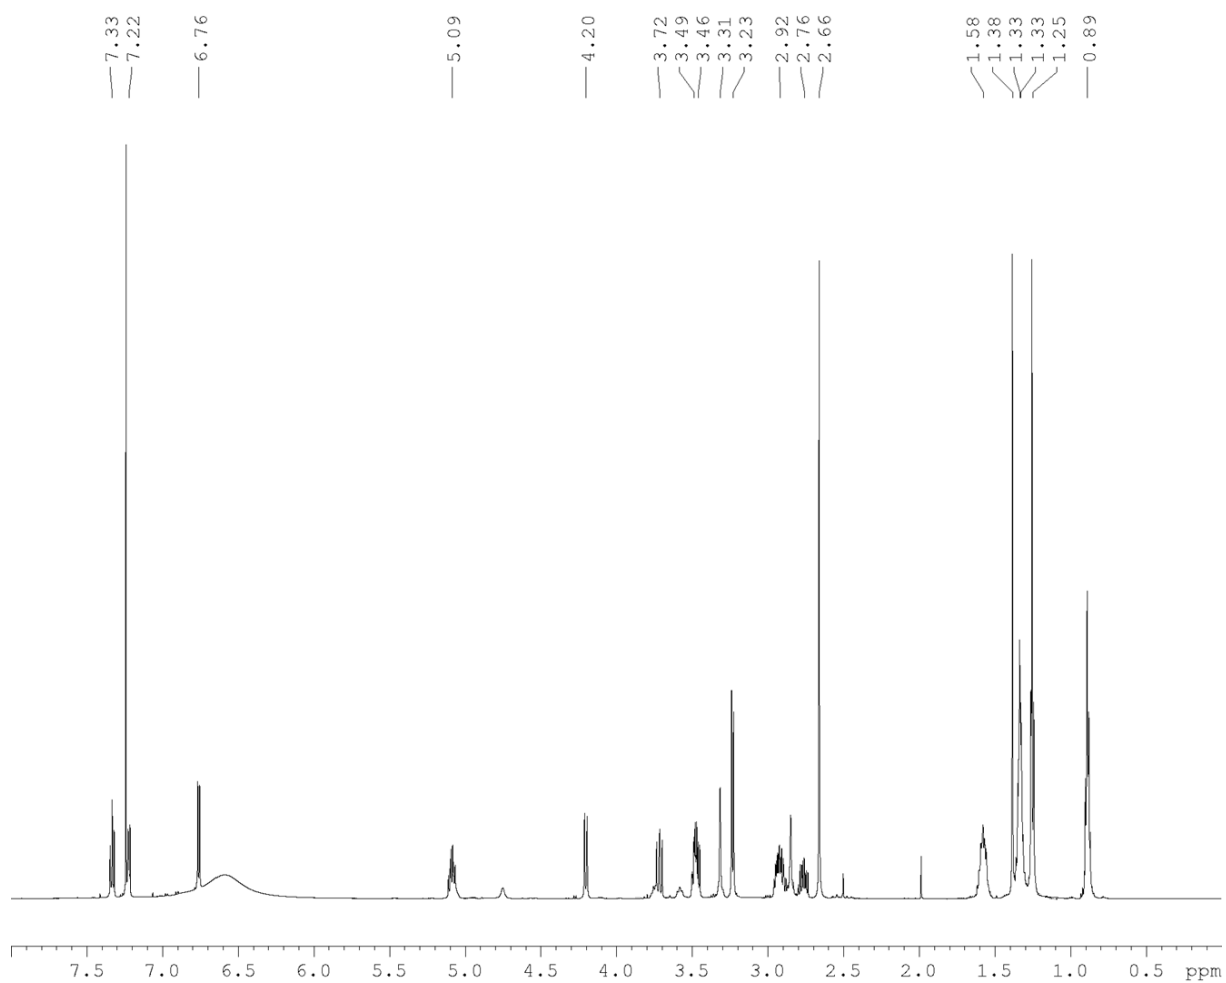

**Figure S1:**  $^1\text{H}$  NMR spectrum of massiliachelin (**1**) in chloroform-*d*.

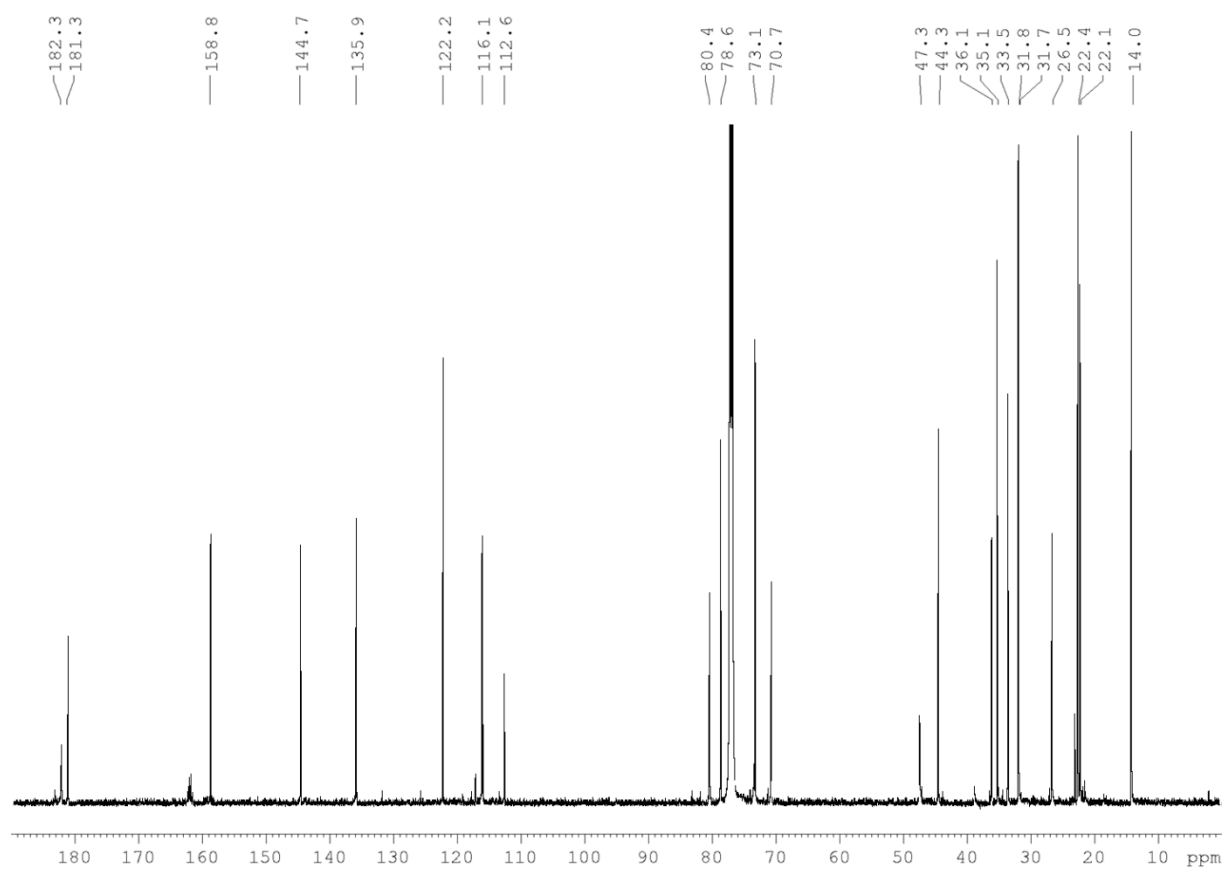

**Figure S2:**  $^1\text{H}$ -decoupled  $^{13}\text{C}$  NMR spectrum of massiliachelin (**1**) in chloroform-*d*.

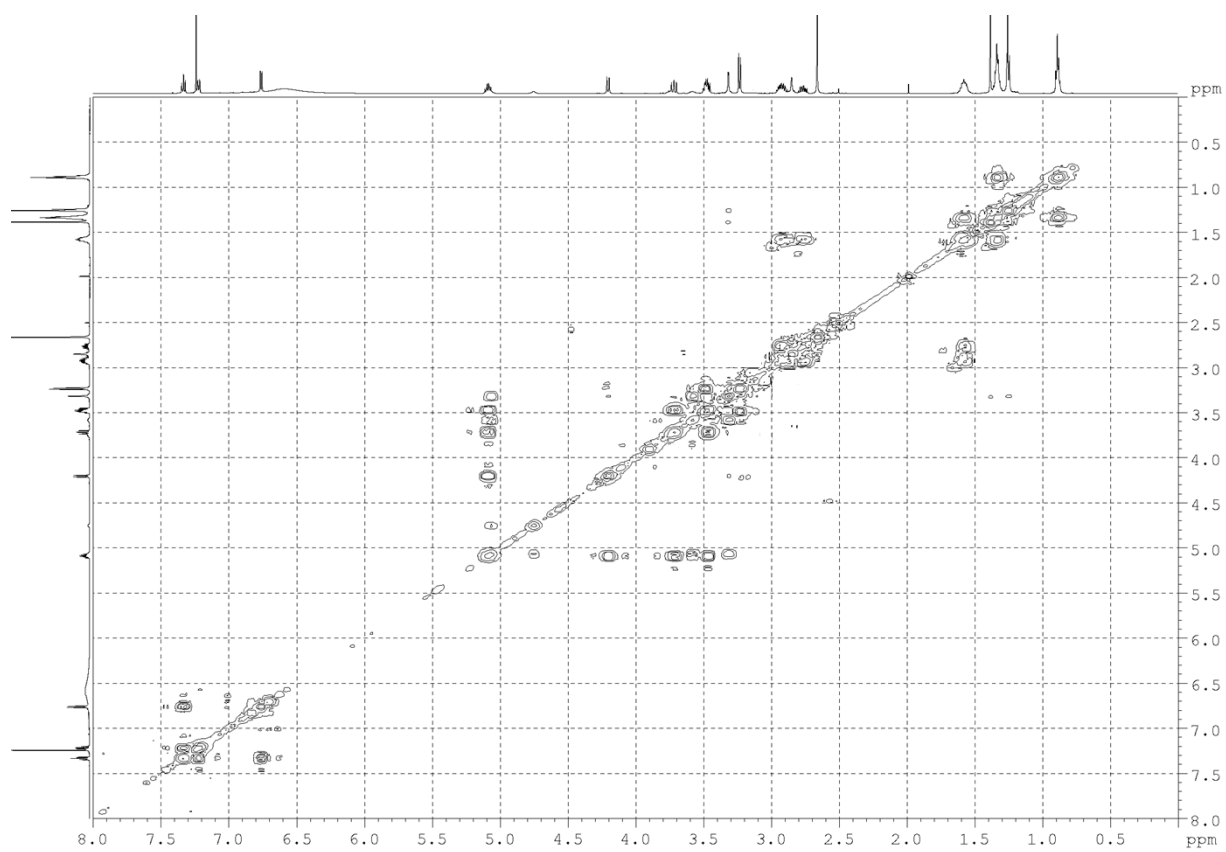

**Figure S3:**  $^1\text{H}$ ,  $^1\text{H}$  COSY spectrum of massiliachelin (**1**) in chloroform-*d*.

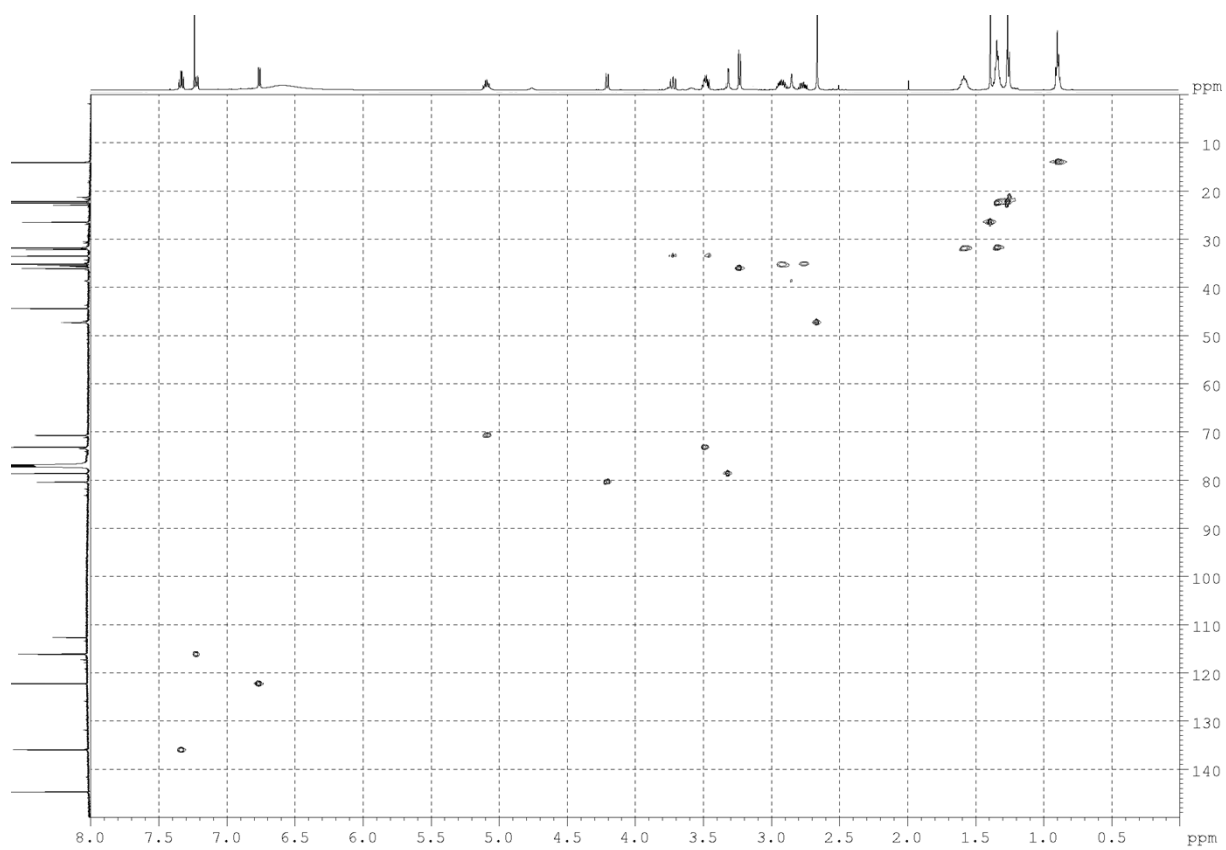

**Figure S4:**  $^1\text{H}$ ,  $^{13}\text{C}$  HSQC spectrum of massiliachelin (**1**) in chloroform-*d*.

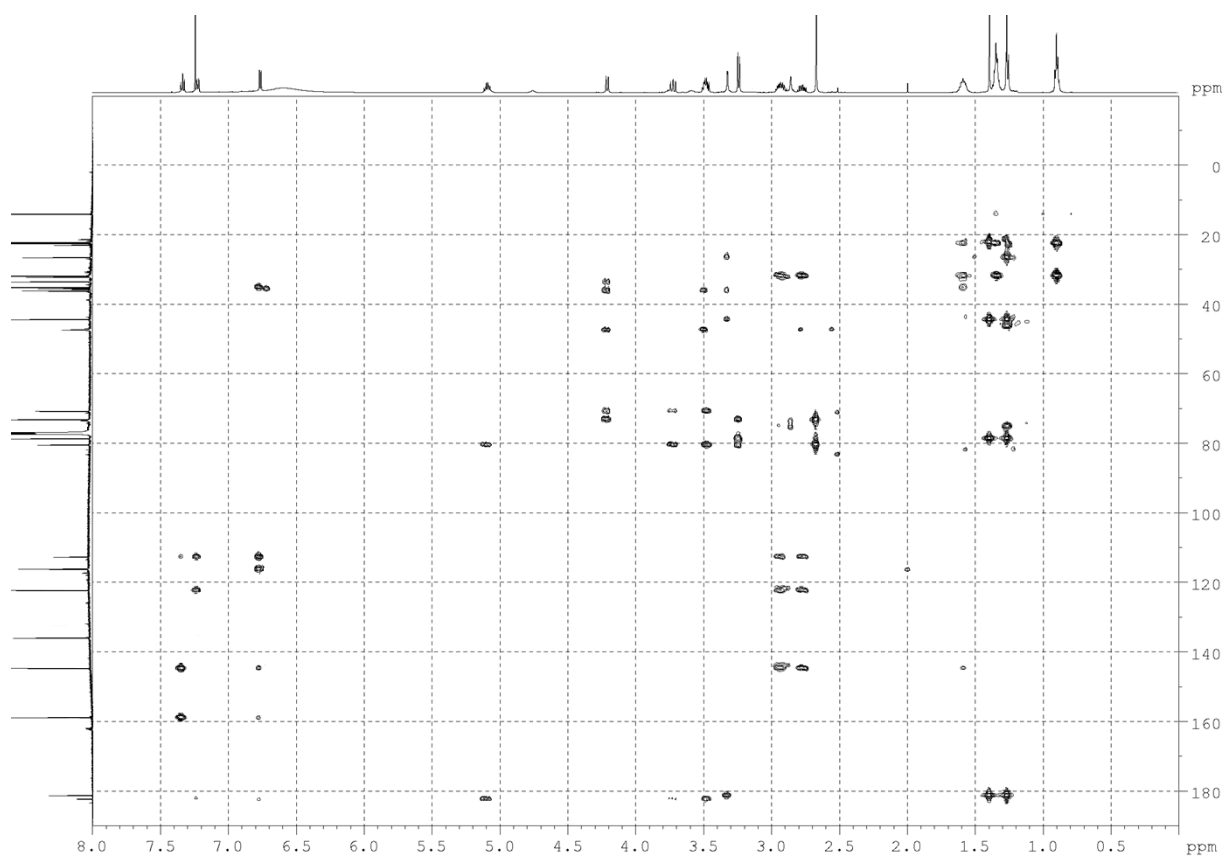

**Figure S5:**  $^1\text{H}$ ,  $^{13}\text{C}$  HMBC spectrum of massiliachelin (**1**) in chloroform-*d*.



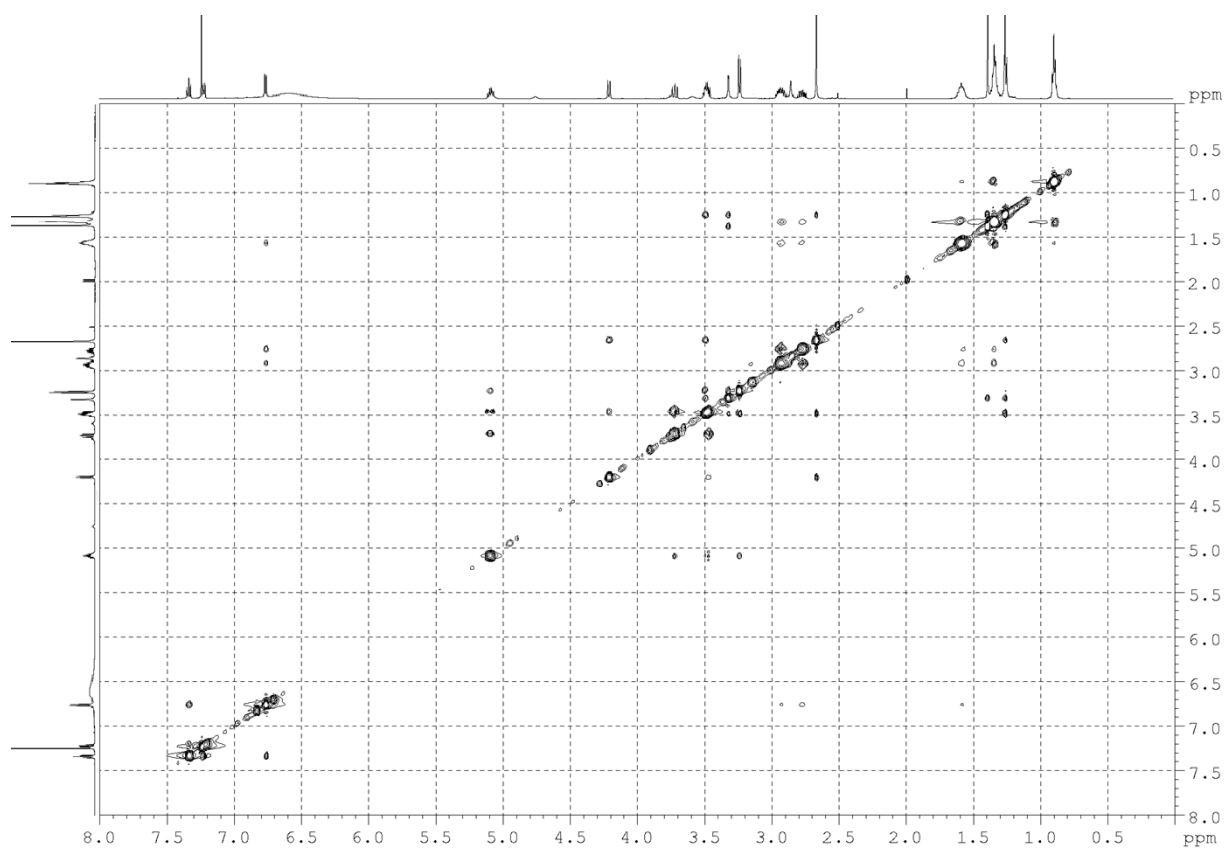

**Figure S6:**  $^1\text{H}$ ,  $^1\text{H}$  NOESY spectrum of massiliachelin (**1**) in chloroform-*d*.

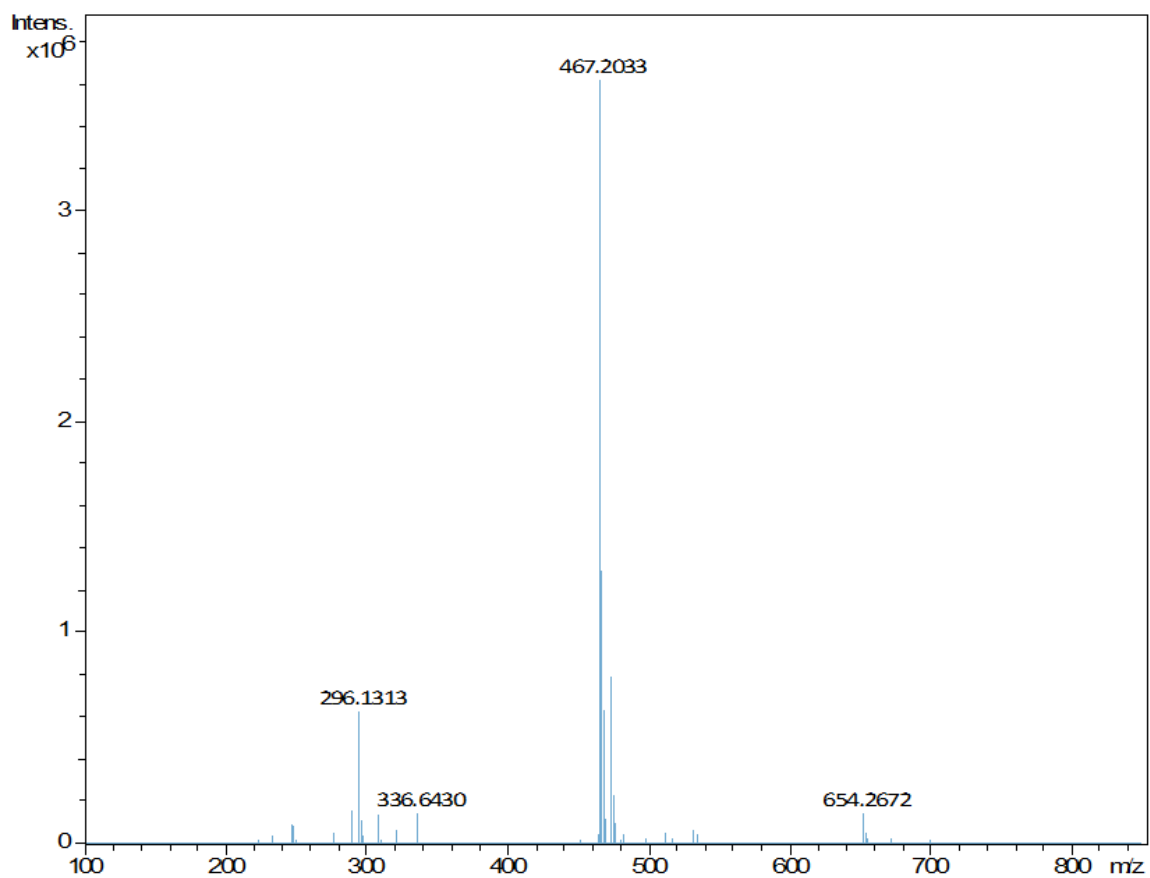

**Figure S7:** HRESIMS spectrum of massiliachelin (**1**).
